# Supplementary material for: Diabetes-free survival among living kidney donors and non-donors with obesity: A longitudinal cohort study
Source: PLOS journal article supplement (doi:10.1371/journal.pone.0276882), 2022-11-18

Diabetes-Free Survival Among Living Kidney Donors and Non-Donors with Obesity: A Longitudinal Cohort Study

Figure S1. CONSORT diagram for living kidney donors

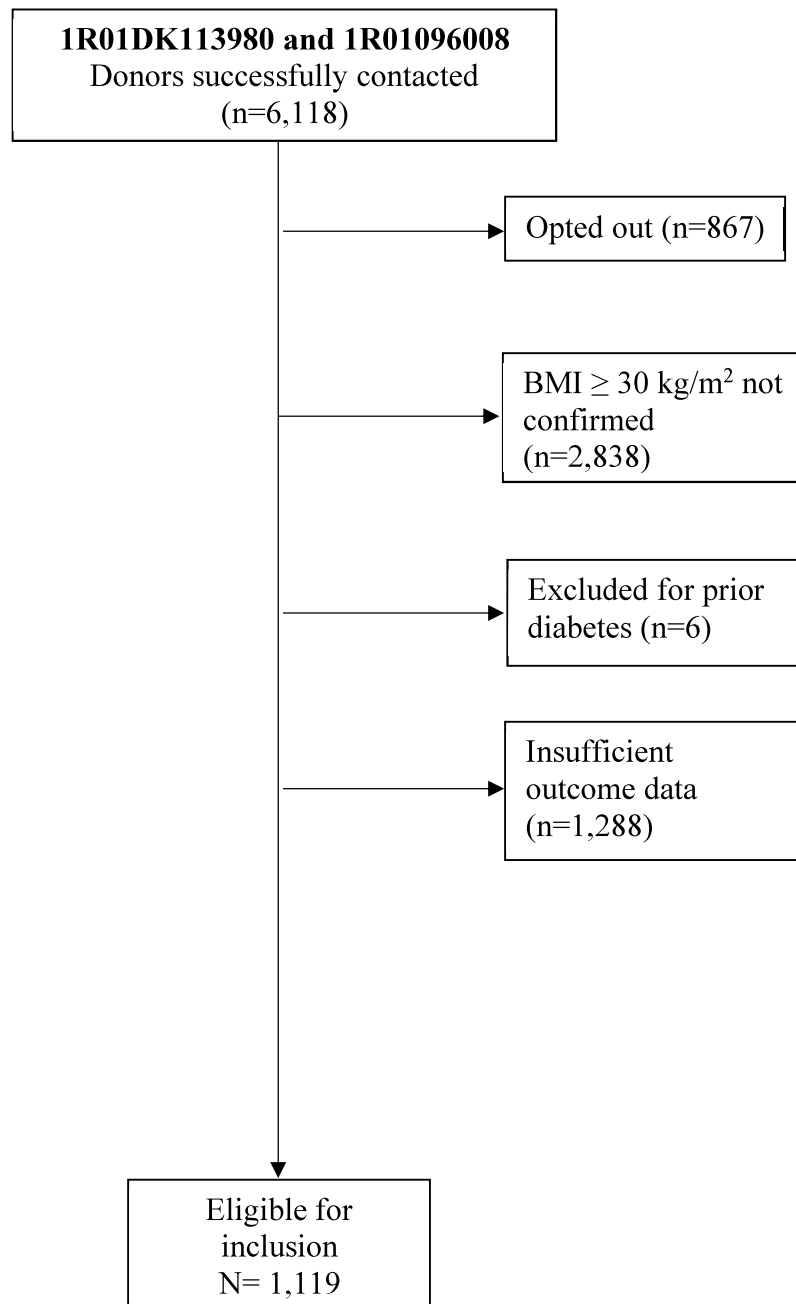

Supplement: S16 (10.1371/journal.pone.0276882.s016) [file journal.pone.0276882.s016]
